# Supplementary material
Source: PubMed Central journal article supplement (PMC3752395)

Fig s1 (Stankovic)

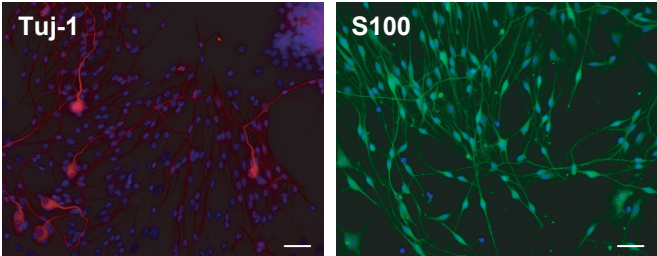

Supplement: NIHMS502837-supplement-01.pdf [file NIHMS502837-supplement-01.pdf]
